# Supplementary material for: Allosteric SHP2 inhibition increases apoptotic dependency on BCL2 and synergizes with venetoclax in FLT3- and KIT-mutant AML
Source: PubMed Central journal article supplement — Cell Rep Med. 2023 Nov 21;4(11):101290. doi: 10.1016/j.xcrm.2023.101290 (PMC10694768; doi:10.1016/j.xcrm.2023.101290), 2023-11-21
Supplement: mmc1.pdf [file mmc1.pdf]

Cell Reports Medicine, Volume 4

## Supplemental information

### **Allosteric SHP2 inhibition increases apoptotic dependency on BCL2 and synergizes with venetoclax in *FLT3*- and *KIT*-mutant AML**

**Bogdan Popescu, Carlos Stahlhut, Theodore C. Tarver, Sydney Wishner, Bianca J. Lee, Cheryl A.C. Peretz, Cuyler Luck, Paul Phojanakong, Juan Antonio Camara Serrano, Henry Hongo, Jose M. Rivera, Simayijiang Xirenayi, John A. Chukinas, Veronica Steri, Sarah K. Tasian, Elliot Stieglitz, and Catherine C. Smith**

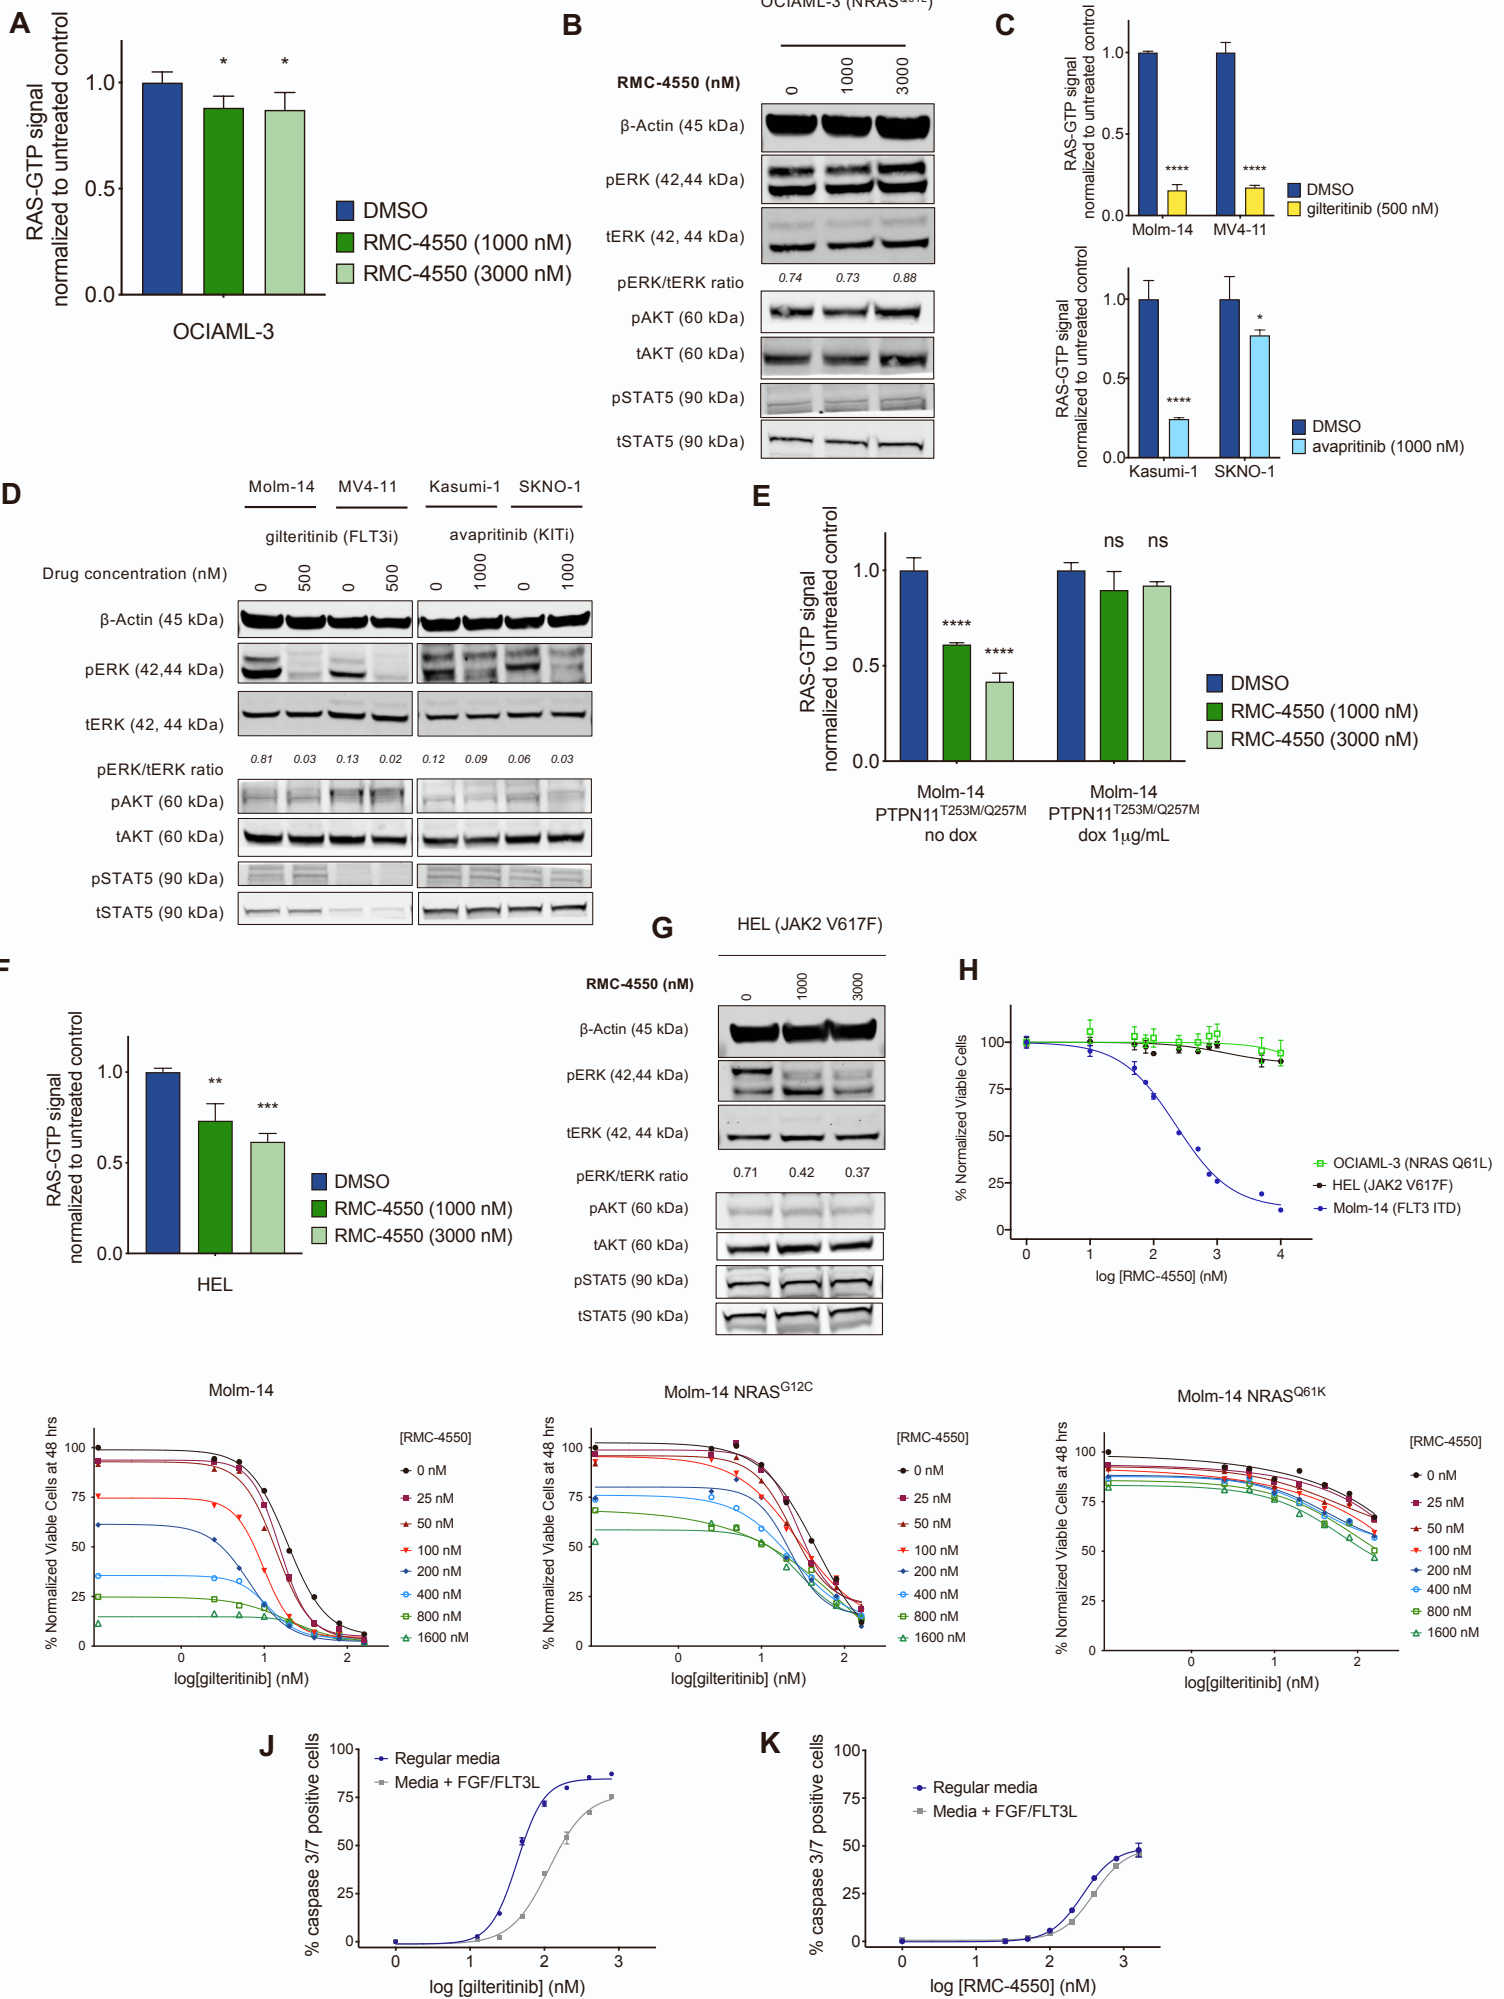

**Supplementary figure S1. SHP2 inhibition has anti-leukemic activity in RTK-driven AML cell lines. Related to Figure 1.** **A**, Colorimetric detection of RAS-GTP levels in OCIAML-3 cells exposed for 90 minutes to RMC-4550. Data represent means of three technical replicates, error bars represent standard deviation (SD); two-tailed ANOVA with Tukey's correction for multiple comparisons was used for statistical analysis (\*\*\*\* $p \leq 0.0001$ , \*\*\* $p \leq 0.001$ , \*\* $p \leq 0.01$ , \* $p \leq 0.05$ , ns, non-significant). **B**, Western blot analysis of OCIAML-3 cell line exposed for 90 minutes to the indicated doses of RMC-4550. Total protein extracts were resolved on a 10% Bis-Tris gel and subjected to immunoblot analysis with the indicated antibodies; actin was used as loading control. For phospho-ERK expression, band intensities from images were normalized to a total ERK control and are shown underneath the relevant bands. **C**, Colorimetric detection of RAS-GTP levels in Molm-14 and MV4-11 cell lines exposed for 90 minutes to RMC-4550 and Kasumi-1 and SKNO-1 cell lines exposed to avapritinib respectively. Data is represented similarly to 1A. **D**, Western blot analysis of Molm-14, MV4-11, Kasumi-1 and SKNO-1 cell lines exposed for 90 minutes to the indicated doses of gilteritinib and avapritinib respectively. **E**, Colorimetric detection of RAS-GTP levels in Molm-14 doxycycline-inducible *PTPN11*<sup>T253M/Q257</sup> cells exposed for 90 minutes to RMC-4550. 1 $\mu$ g/mL of doxycycline was used to induce the *PTPN11* mutation expression. Data is represented similarly to 1A. **F**, Colorimetric detection of RAS-GTP levels in HEL cells exposed for 90 minutes to RMC-4550. Data is represented similarly to 1A. **G**, Western blot analysis of HEL cell line exposed for 90 minutes to the indicated doses of RMC-4550. **H**, Dose-response curves representing relative proliferation of HEL cells after 48 hours of exposure to serial doses of RMC-4550. **I**, Dose-response curves representing relative proliferation of Molm-14, Molm-14 *NRAS*<sup>G12C</sup> and Molm-14 *NRAS*<sup>Q61K</sup> cells after 48 hours of exposure to serial doses of gilteritinib and RMC-4550. **J**, **K**, Dose-response curves representing apoptosis after 24 hours of treatment with indicated doses of gilteritinib and RMC-4550 in Molm-14 cells cultured in either regular growth medium or medium supplemented with 10 ng/mL FGF2 and 10 ng/mL FLT3-L. Data represented as mean  $\pm$  SD of three technical replicates.

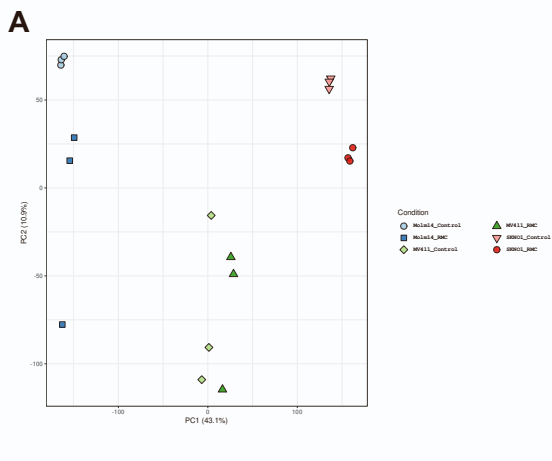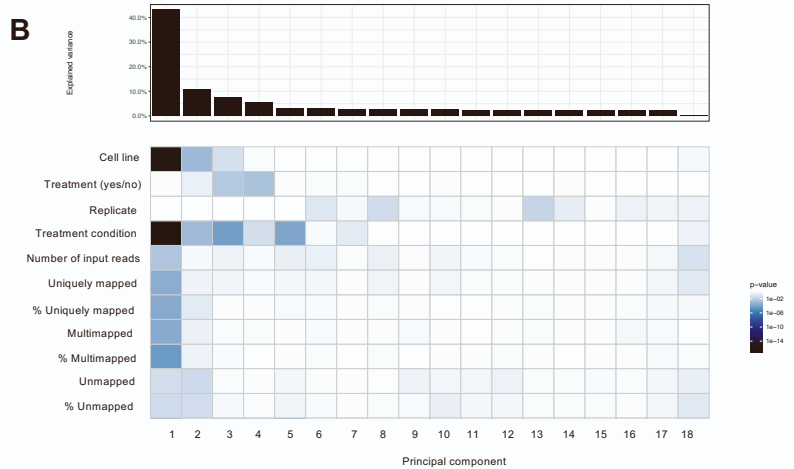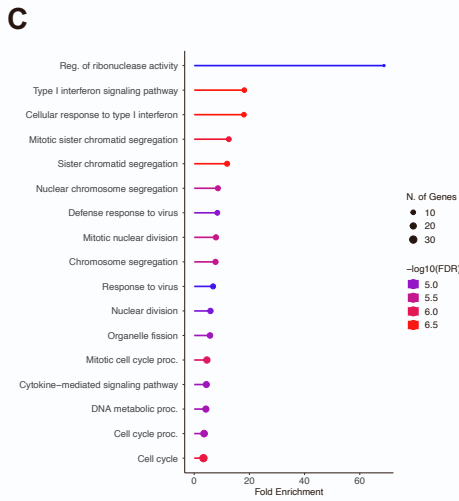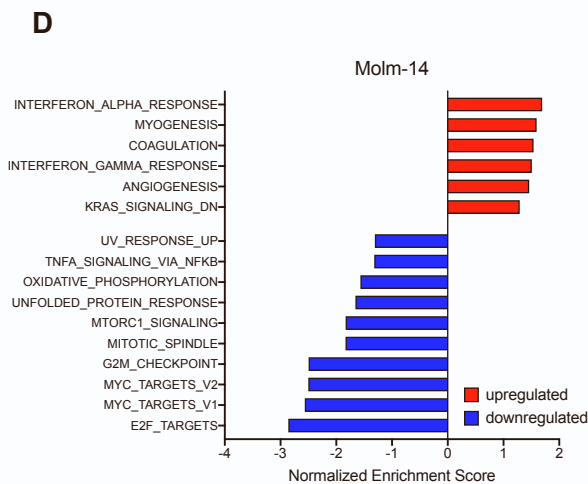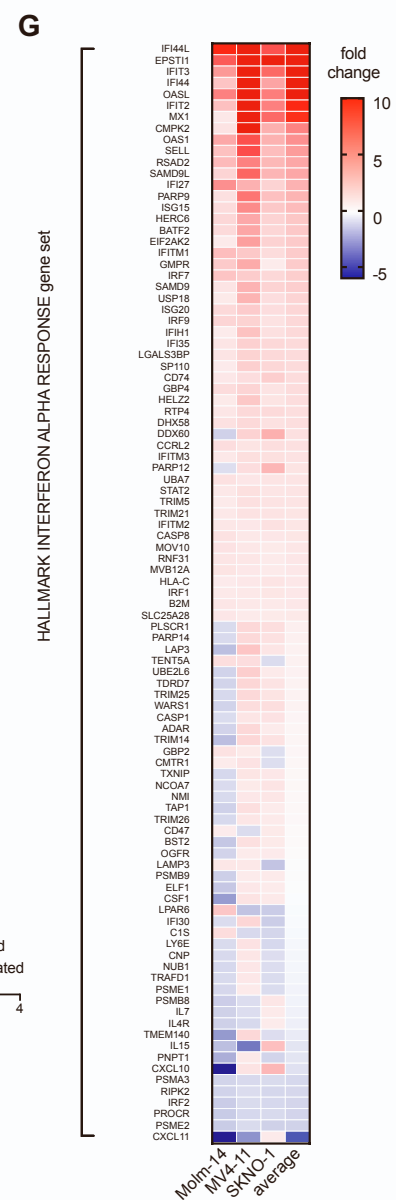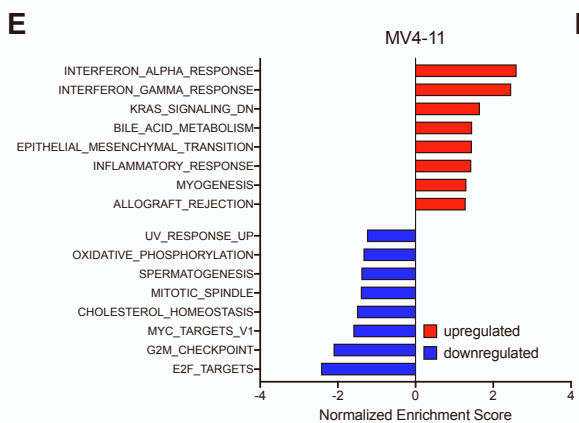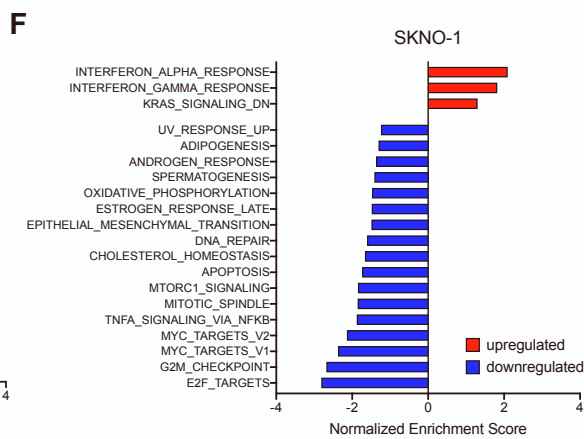

**Supplementary figure S2. SHP2 inhibition alters the transcriptomic profile of RTK-driven AML. Related to Figure 2.** **A**, Principal component analysis (PCA) scatter plot for the first two principal components from the normalized reads data. Each symbol corresponds to individually treated cell cultures of each cell line (n=3), treated with either DMSO or RMC-4550. **B**, Plots showing the significance of association tests between the available covariates and the principal components from the data. The statistical test used are: ANOVA for a categorical covariate, and a Spearman correlation test for a continuous covariate. p-values are shown as continuous measures (gradients of blue) using a statistical significance threshold of  $p < 0.05$  and a Benjamini-Hochberg adjustment for multiple testing. **C**, Gene ontology (GO) Biological Process analysis of the 132 differentially expressed genes depicted in main figure 2B. The analysis was performed using the ShinyGO v0.77 app at <https://bioinformatics.sdstate.edu/go> and illustrates top 17 enrichments, selected by FDR cutoff of 0.05 and sorted by Fold Enrichment. **D-F**, Barplots representing enriched hallmark gene sets as resulted from GSEA analysis performed in each individual cell line. Data represents gene sets enriched with a nominal p value  $> 0.05$  and sorted by Normalized Enrichment Scores. **G**, heatmap representing relative expression of genes in the Hallmark Interferon Alpha Response (MSigDB) gene set in all three cell lines.

**A**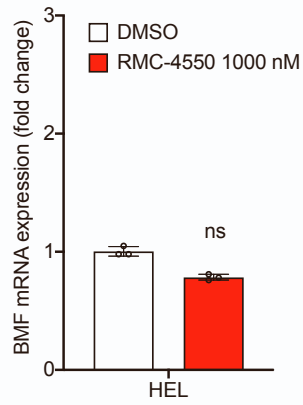**B**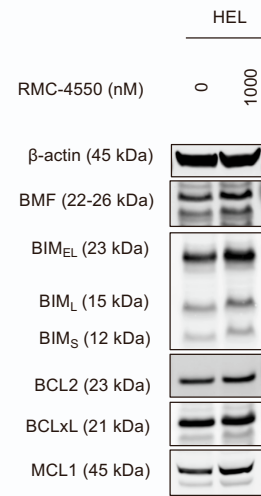**C**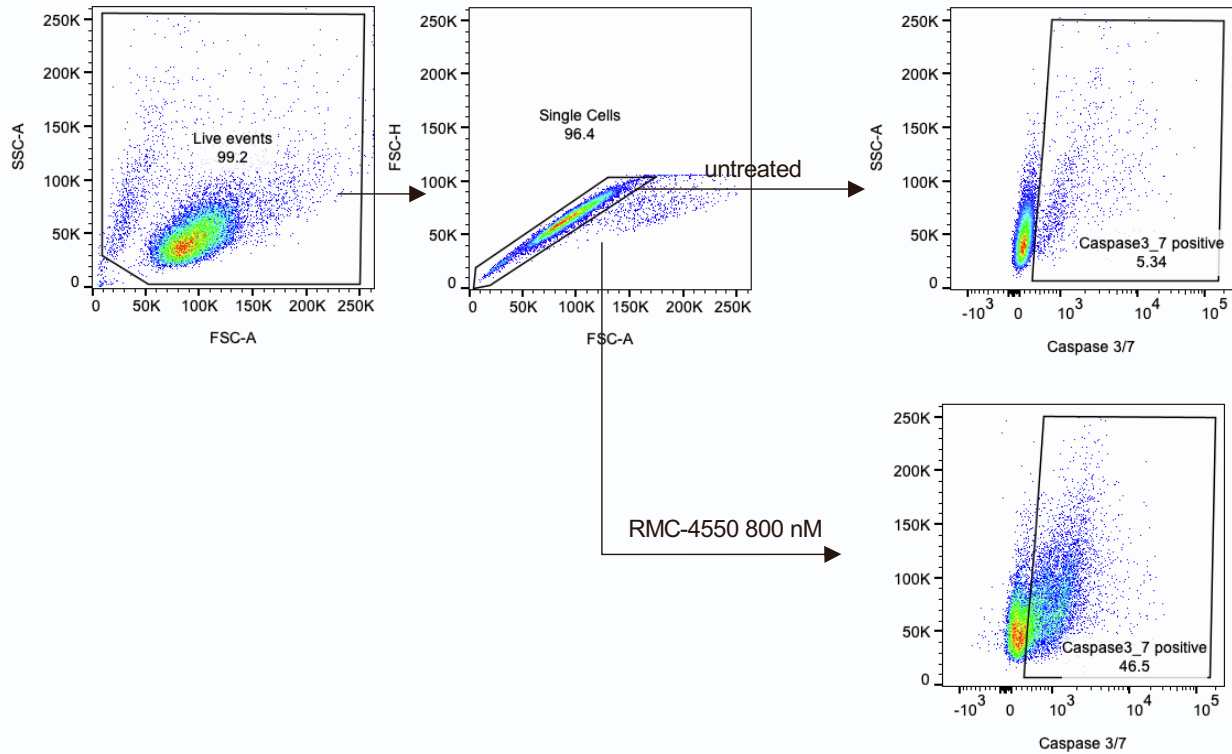**D**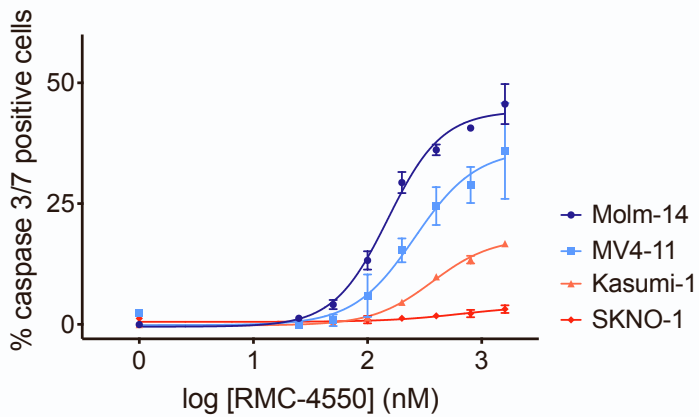**E**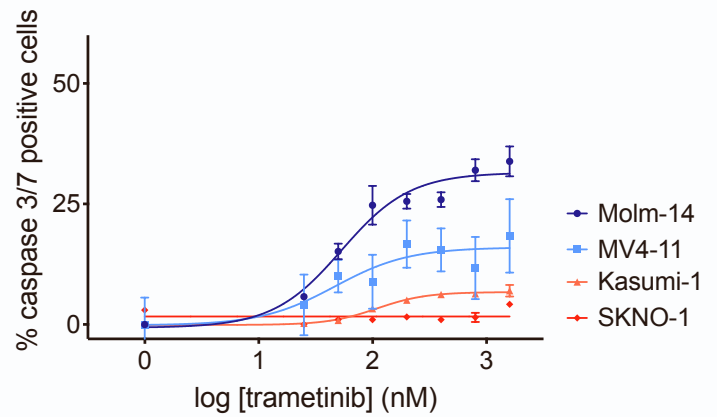

|                   | Molm-14 | MV4-11 | Kasumi-1 | SKNO-1 |
|-------------------|---------|--------|----------|--------|
| Max. caspase3/7 % | 45.62   | 34.4   | 16.75    | 1.96   |
| SD                | 4.15    | 10.15  | 0.69     | 0.8    |

|                   | Molm-14 | MV4-11 | Kasumi-1 | SKNO-1 |
|-------------------|---------|--------|----------|--------|
| Max. caspase3/7 % | 33.83   | 20.71  | 7        | 1.26   |
| SD                | 3.09    | 7.39   | 0.21     | 0.2    |

**Supplementary figure S3. Related to Figure 3. Apoptosis induction in *FLT3*- and *KIT*- mutant AML cell lines.**

**Related to Figure 3. A**, RT-qPCR data representing gene expression fold change of BMF gene in HEL cell line after 24 hours of treatment with RMC-4550. Data represent mean  $\pm$  SD of three technical replicates; Wilcoxon test was used for statistical significance. **B**, Western blot analysis of pro- and anti-apoptotic proteins in HEL cells exposed to 1000 nM of RMC-4550 for 24 hours; actin was used as loading control. **C**, Representative gating strategy used to measure caspase3/7 positive cells. **D-E**, Dose-response curves showing apoptosis measured by flow cytometry in Molm-14, MV4-11, Kasumi-1 and SKNO-1 cell lines after 24 hours of exposure to increasing doses of RMC-4550 and trametinib respectively. Caspase3/7 positive cells were gated and normalized to untreated controls. Data represent means  $\pm$  SD of three technical replicates per drug condition.

**A**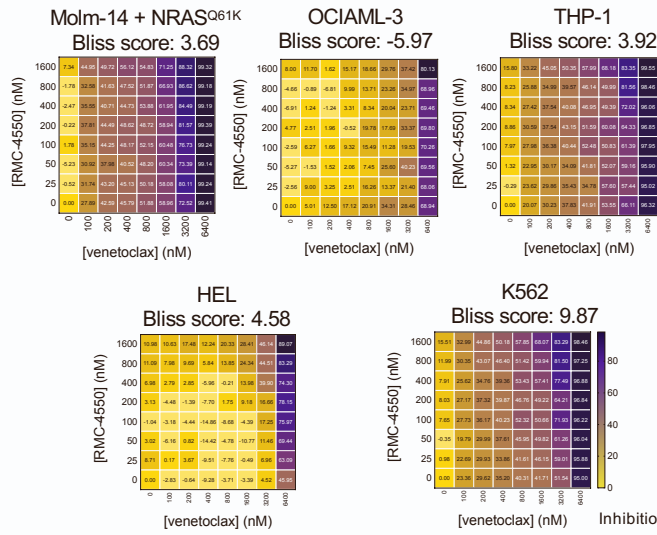**B**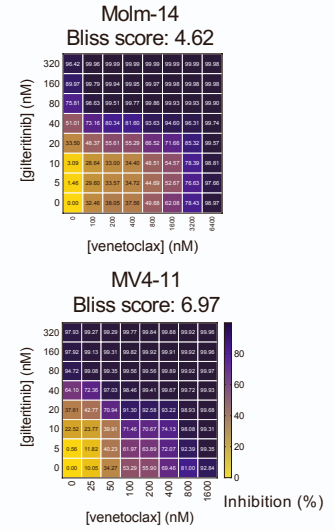**C**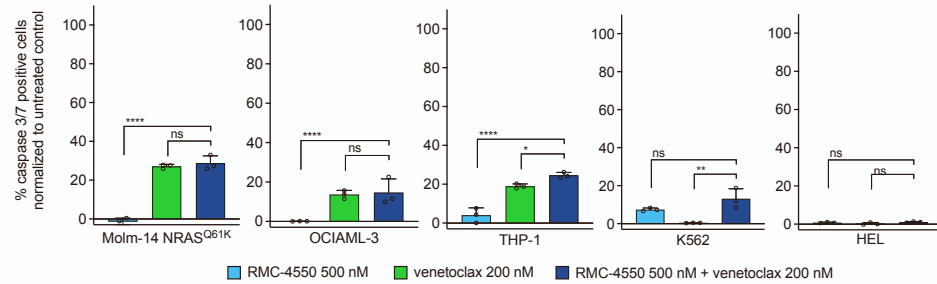**D**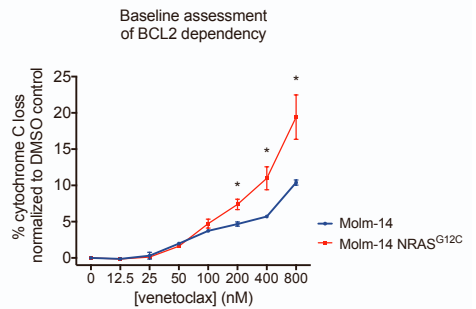**E**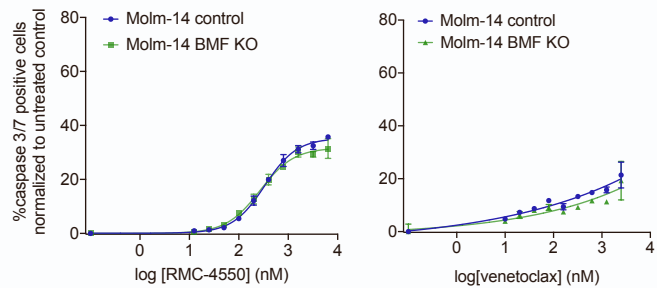**F**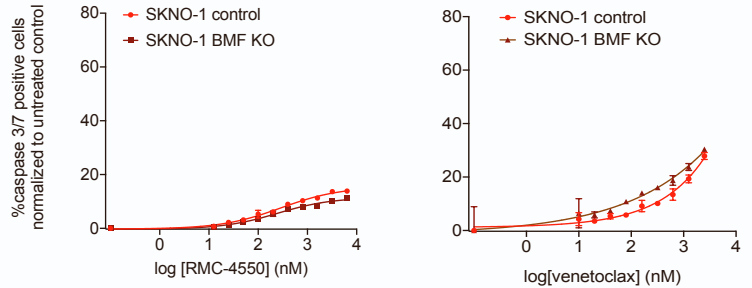**G**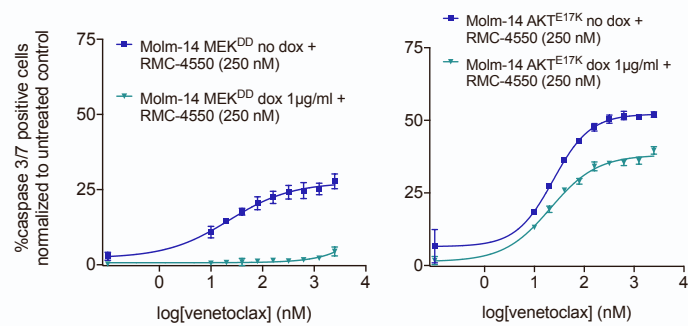**H**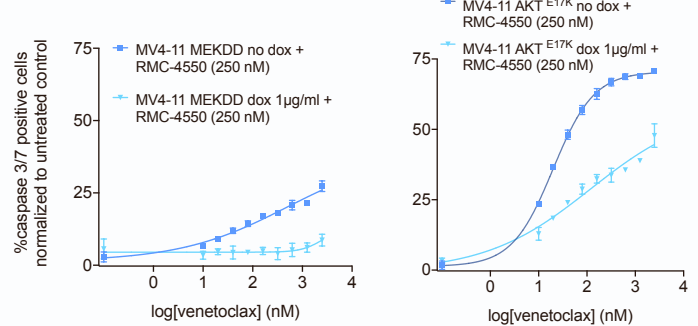**I**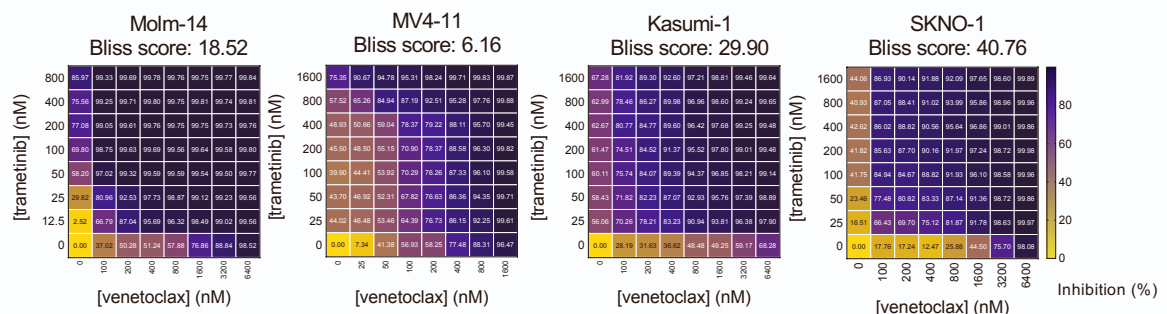



**Supplementary figure S4. Combination therapy with RMC-4550 and venetoclax has synergistic activity in RTK-driven AML cell line models. Related to Figure 4.** **A-B**, Dose-response matrices representing normalized cell viability inhibition following 48 hours of treatment with increasing doses of RMC-4550 and venetoclax (A) and gilteritinib and venetoclax (B) in the indicated cell lines. Synergy scores were computed using Bliss method within Synergy Finder v3.0 software. **C**, Apoptosis measured by flow cytometry after 24 hours for treatment with RMC-4550 and venetoclax at indicated concentrations. Results depict caspase3/7 positive cells normalized to untreated controls. Data represent mean  $\pm$  SD of three technical replicates; statistical analysis was performed using one-way ANOVA test with Dunnett correction for multiple comparisons. **D**, iBH3 profiling data representing normalized cytochrome C release following exposure to increasing doses of BCL2 inhibitor venetoclax in Molm-14 and Molm-14 NRAS<sup>G12C</sup> cells. Data represents mean  $\pm$  SD of three technical replicates per drug condition and *t* test with Sidak-Bonferroni correction for multiple comparisons was used for statistical significance (\*\*\*\**p*  $\leq$  0.0001, \*\*\**p*  $\leq$  0.001, \*\**p*  $\leq$  0.01, \**p*  $\leq$  0.05, ns, non-significant). **E-F**, Dose-response curves of apoptosis measured after 24 hours of treatment with either RMC-4550 or venetoclax in Molm-14 and SKNO-1 BMF KO cells compared to control cells. Data represent mean  $\pm$  SD of three technical replicates per drug condition, normalized to untreated controls; **G-H**, Dose-response curves of apoptosis measured after 24 hours of treatment with RMC-4550 and venetoclax in Molm-14 and MV4-11 cell lines expressing *MEK*<sup>DD</sup> and *AKT*<sup>E17K</sup> doxycycline-inducible mutations, compared to uninduced control cells. Data represent mean  $\pm$  SD of three technical replicates per drug condition, normalized to untreated controls; **I**, Dose-response matrices representing normalized cell viability inhibition following 48 hours of treatment with increasing doses of trametinib and venetoclax in the indicated cell lines. Synergy scores were computed using Bliss method within Synergy Finder v3.0 software.

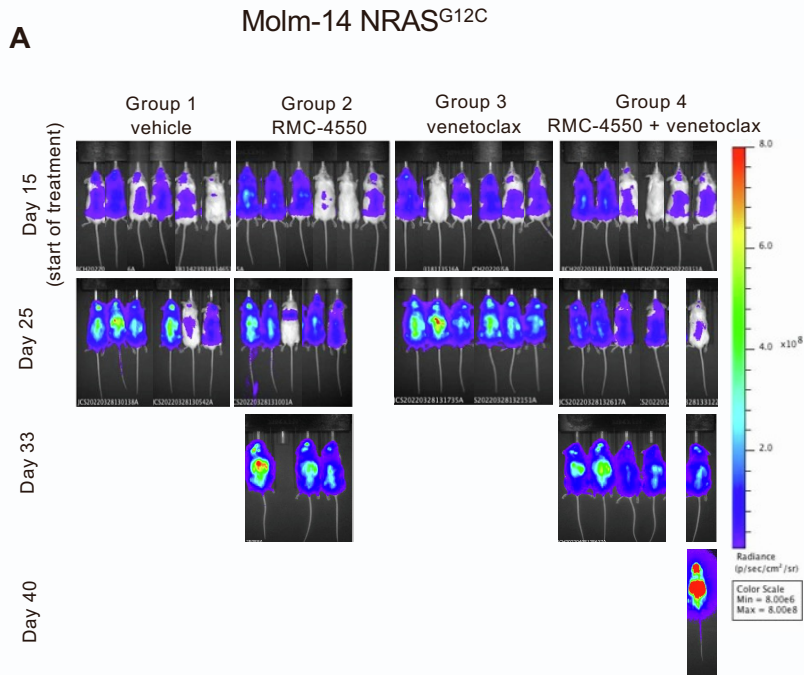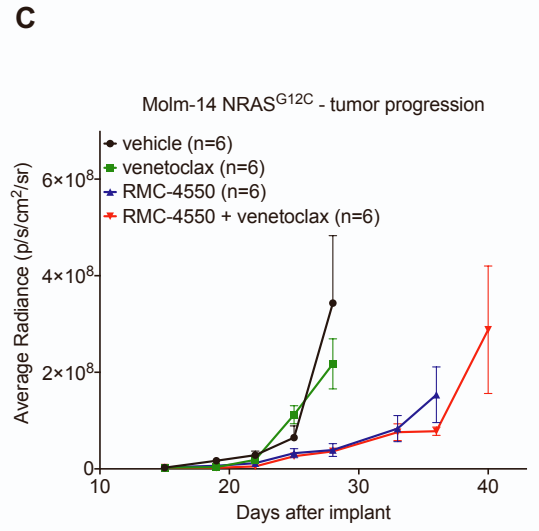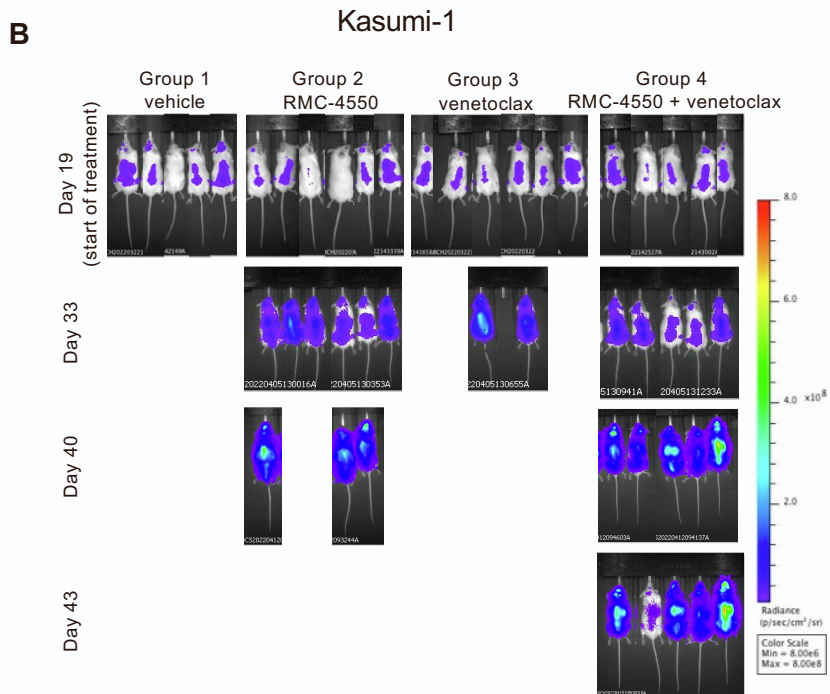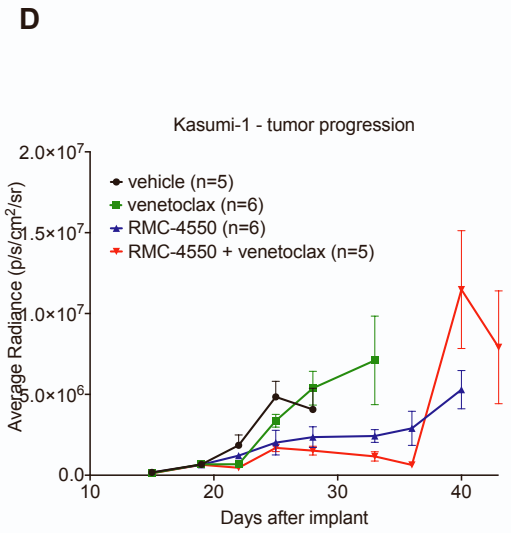

**Supplementary figure S5. Combination therapy with RMC-4550 and venetoclax is effective *in vivo* in CDX AML models. Related to Figure 5. A, B, Representative images of *in vivo* BLI assessment of NSG mice engrafted with luciferase-tagged Molm-14 *NRAS*<sup>G12C</sup> (n=6/group, **A**) and Kasumi-1 (n=5/group, **B**) cells over the course of the trial. C, D, Quantification of BLI data from the Molm-14 *NRAS*<sup>G12C</sup> (**C**) and Kasumi-1 (**D**) CDX studies, data represents mean  $\pm$  SD (n=5/group).**

**A**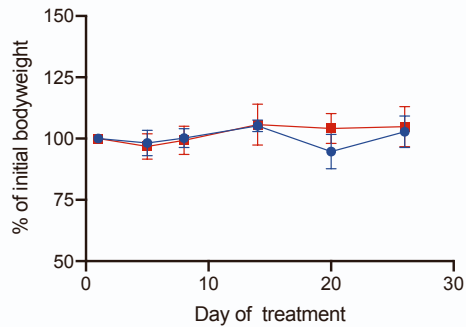

- RMC-4550 20 mg/kg + venetoclax 100 mg/kg (n=5)
- RMC-4550 30 mg/kg + venetoclax 100 mg/kg (n=5)

**B**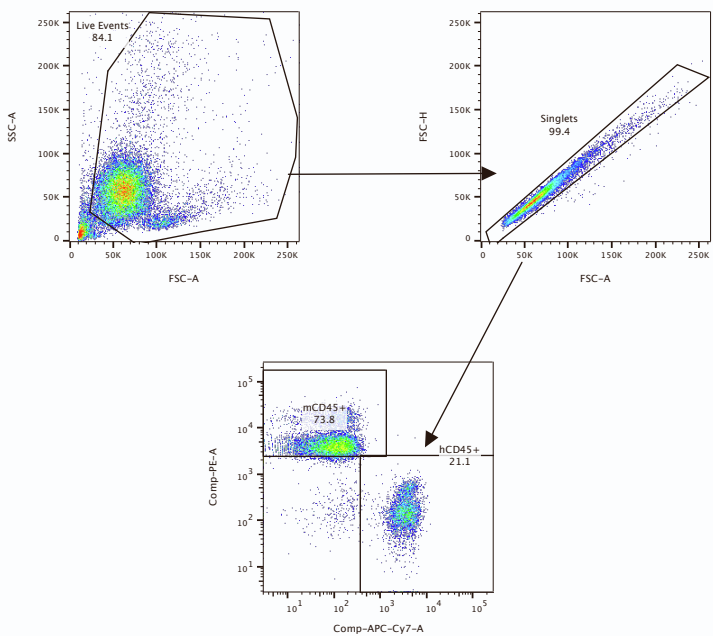**C**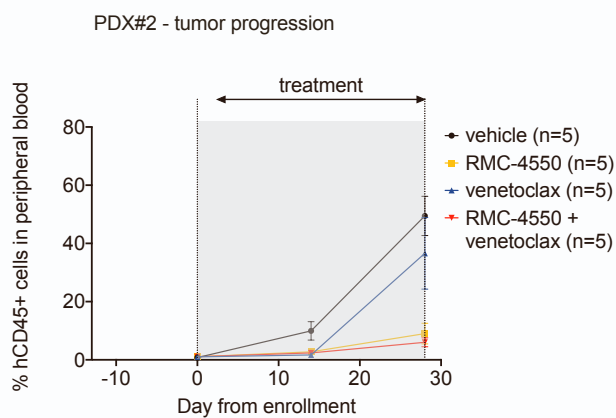**D**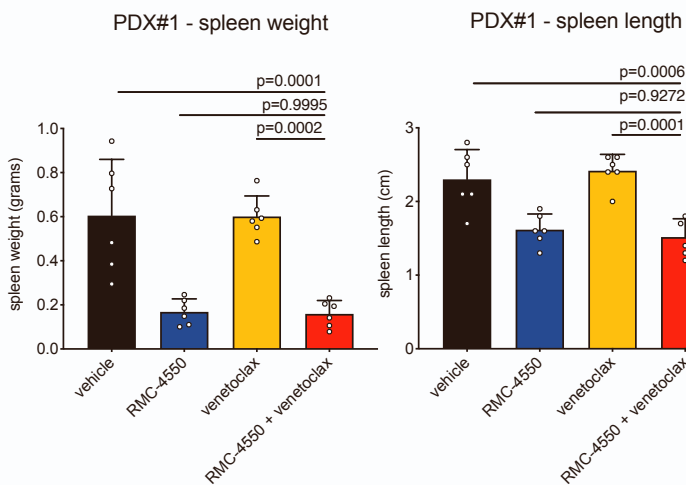**E**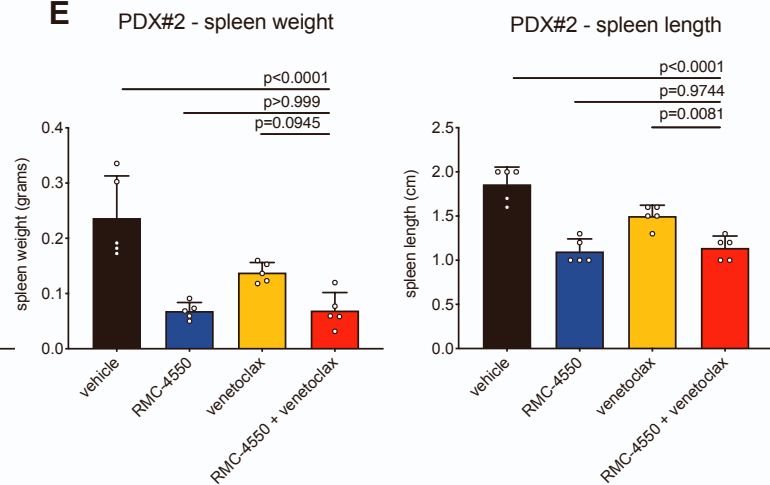

**Supplementary figure S6. Simultaneous SHP2 and BCL2 inhibition is effective in FLT3-mutant PDX AML models. Related to Figure 6.** **A**, Body weight changes over the course of 28 days of treatment with RMC-4550 at 20 mg/kg compared to 30 mg/kg and venetoclax 100 mg/kg. Data represents mean  $\pm$  SD (n=5/group). **B**, Representative gating strategy for flow cytometry assessment of hCD45+ cells **C**, quantification of hCD45+ cells over the course of treatment in the four treatment groups in the PDX #2 study. **D, E**, Measurements of spleen weight and length at the study termination in PDX #1 (n=6/group, **D**) and PDX #2 – n=5/group, **E**). Data represents mean  $\pm$  SD; one-way ANOVA with Tukey correction for multiple comparisons was used for statistical analysis (\*\*\*\*p  $\leq$  0.0001, \*\*\*p  $\leq$  0.001, \*\*p  $\leq$  0.01, \*p  $\leq$  0.05, ns, non-significant).

| <i>Cell line</i> | <i>Signaling mutation</i> | <i>IC<sub>50</sub> (nM)</i> |
|------------------|---------------------------|-----------------------------|
| Molm-14          | FLT3-ITD                  | 146.3                       |
| MV4-11           | FLT3-ITD                  | 120                         |
| Kasumi-1         | KIT N822K                 | 192.9                       |
| SKNO-1           | KIT N822K                 | 479.7                       |
| U937             | PTPN11 G60R               | >10000                      |
| OCIAML-3         | NRAS Q61L                 | >10000                      |
| THP-1            | NRAS G12D                 | >10000                      |
| NOMO-1           | NRAS G13D                 | >10000                      |
| K562             | BCR-ABL1                  | 2086                        |
| HEL              | JAK2 V617F                | >10000                      |

**Supplementary Table S1 – IC<sub>50</sub> values of RMC-4550 in parental AML cell lines. Related to Figure 1.**

| <i>Figure 1E</i>       | <i>Cell line</i>    | <i>Treatment condition</i> | <i>Normalized pERK/tERK ratio</i> |                              |
|------------------------|---------------------|----------------------------|-----------------------------------|------------------------------|
|                        | Molm-14             | untreated                  | 1.00                              |                              |
|                        |                     | RMC-4550 1000 nM           | 0.50                              |                              |
|                        |                     | RMC-4550 3000 nM           | 0.29                              |                              |
|                        | MV4-11              | untreated                  | 1.00                              |                              |
|                        |                     | RMC-4550 1000 nM           | 0.35                              |                              |
|                        |                     | RMC-4550 3000 nM           | 0.28                              |                              |
|                        | Kasumi-1            | untreated                  | 1.00                              |                              |
|                        |                     | RMC-4550 1000 nM           | 0.19                              |                              |
|                        |                     | RMC-4550 3000 nM           | 0.19                              |                              |
|                        | SKNO-1              | untreated                  | 1.00                              |                              |
|                        |                     | RMC-4550 1000 nM           | 0.14                              |                              |
|                        |                     | RMC-4550 3000 nM           | 0.11                              |                              |
| <i>Figure S1B, SIG</i> | <i>Cell line</i>    | <i>Treatment condition</i> | <i>Normalized pERK/tERK ratio</i> |                              |
|                        | OCIAML-3            | untreated                  | 1.00                              |                              |
|                        |                     | RMC-4550 1000 nM           | 0.99                              |                              |
|                        |                     | RMC-4550 3000 nM           | 1.18                              |                              |
|                        | HEL                 | untreated                  | 1.00                              |                              |
|                        |                     | RMC-4550 1000 nM           | 0.60                              |                              |
|                        |                     | RMC-4550 3000 nM           | 0.53                              |                              |
| <i>Figure S1D</i>      | <i>Cell line</i>    | <i>Treatment condition</i> | <i>Normalized pERK/tERK ratio</i> |                              |
|                        | Molm-14             | untreated                  | 1.00                              |                              |
|                        |                     | gilteritinib 500 nM        | 0.04                              |                              |
|                        | MV4-11              | untreated                  | 1.00                              |                              |
|                        |                     | gilteritinib 500 nM        | 0.18                              |                              |
|                        | Kasumi-1            | untreated                  | 1.00                              |                              |
|                        |                     | avapritinib 1000 nM        | 0.72                              |                              |
| SKNO-1                 | untreated           | 1.00                       |                                   |                              |
|                        | avapritinib 1000 nM | 0.61                       |                                   |                              |
| <i>Figure 3C</i>       | <i>Cell line</i>    | <i>Treatment condition</i> | <i>Normalized BMF/actin</i>       | <i>Normalized MCL1/actin</i> |
|                        | Molm-14             | untreated                  | 1.00                              | 1.00                         |
|                        |                     | RMC-4550 1000 nM           | 6.32                              | 0.62                         |
|                        | MV4-11              | untreated                  | 1.00                              | 1.00                         |

|                   |                   |                            |                              |                                   |
|-------------------|-------------------|----------------------------|------------------------------|-----------------------------------|
|                   |                   | RMC-4550 1000 nM           | 1.79                         | 0.76                              |
|                   | Kasumi-1          | untreated                  | 1.00                         | 1.00                              |
|                   |                   | RMC-4550 1000 nM           | 1.47                         | 1.03                              |
|                   | SKNO-1            | untreated                  | 1.00                         | 1.00                              |
|                   |                   | RMC-4550 1000 nM           | 2.80                         | 0.57                              |
|                   | OCIAML-3          | untreated                  | 1.00                         | 1.00                              |
|                   |                   | RMC-4550 1000 nM           | 0.95                         | 0.82                              |
| <i>Figure S3B</i> | HEL               | untreated                  | 1.00                         | 1.00                              |
|                   |                   | RMC-4550 1000 nM           | 1.23                         | 1.46                              |
| <i>Figure 4C</i>  | <i>Cell line</i>  | <i>Treatment condition</i> | <i>Normalized BMF/actin</i>  |                                   |
|                   | Molm-14           | untreated                  | 1.00                         |                                   |
|                   |                   | RMC-4550 1000 nM           | 6.84                         |                                   |
|                   | Molm-14 BMF KO    | untreated                  | 1.00                         |                                   |
|                   |                   | RMC-4550 1000 nM           | 0.63                         |                                   |
|                   | SKNO-1            | untreated                  | 1.00                         |                                   |
|                   |                   | RMC-4550 1000 nM           | 4.50                         |                                   |
|                   | SKNO-1 BMF KO     | untreated                  | 1.00                         |                                   |
|                   |                   | RMC-4550 1000 nM           | 0.38                         |                                   |
| <i>Figure 4F</i>  | <i>Cell line</i>  | <i>Treatment condition</i> | <i>Normalized MCL1/actin</i> | <i>Normalized pERK/tERK ratio</i> |
|                   | Molm-14           | untreated                  | 1.00                         | 1.00                              |
|                   |                   | 90 min RMC-4550 1000 nM    | 1.16                         | 0.20                              |
|                   |                   | 90 min venetoclax 200 nM   | 1.32                         | 0.85                              |
|                   |                   | 90 min combination         | 1.25                         | 0.14                              |
|                   |                   | 24 hrs RMC-4550 1000 nM    | 0.47                         | 2.37                              |
|                   |                   | 24 hrs venetoclax 200 nM   | 1.05                         | 0.26                              |
|                   |                   | 24 hrs combination         | 0.12                         | 0.26                              |
|                   | Molm-14 NRAS G12C | untreated                  | 1.00                         | 1.00                              |
|                   |                   | 90 min RMC-4550 1000 nM    | 0.97                         | 0.73                              |
|                   |                   | 90 min venetoclax 200 nM   | 1.19                         | 0.92                              |
|                   |                   | 90 min combination         | 1.02                         | 0.87                              |
|                   |                   | 24 hrs RMC-4550 1000 nM    | 0.38                         | 0.86                              |
|                   |                   | 24 hrs venetoclax 200 nM   | 0.60                         | 0.63                              |
|                   | SKNO-1            | untreated                  | 1.00                         | 1.00                              |
|                   |                   | 90 min RMC-4550 1000 nM    | 1.09                         | 0.07                              |
|                   |                   | 90 min venetoclax 200 nM   | 1.16                         | 1.02                              |
|                   |                   | 90 min combination         | 1.49                         | 0.06                              |
|                   |                   | 24 hrs RMC-4550 1000 nM    | 0.83                         | 0.31                              |
|                   |                   | 24 hrs venetoclax 200 nM   | 1.75                         | 0.72                              |
|                   |                   | 24 hrs combination         | 0.72                         | 0.28                              |

**Supplementary Table S2 – Normalized quantified signal from western blots. Related to Figures 1, 3, 4, S1, S3.**

| <i>Sample/Local ID</i> | <i>Age</i> | <i>Gender</i> | <i>Disease status</i>            | <i>Previous treatment</i>                                                                         | <i>Clinical genotype</i>                                |
|------------------------|------------|---------------|----------------------------------|---------------------------------------------------------------------------------------------------|---------------------------------------------------------|
| PDX #1 / HM0007        | 24         | F             | Relapsed AML                     | 7+3, HiDAC x2, alloHSCT                                                                           | FLT3-ITD                                                |
| PDX #2 / CD33CART_005  | 33         | M             | Relapsed AML                     | 7+3+midostaurin, HiDAC+midostaurin, CLAG-M, alloHSCT, Ara-C, gilteritinib, sorafenib, azacitidine | FLT3-ITD<br>NUP-98-NSD1 fusion<br>WT1 indels (in trans) |
| CFU-AML #1             | 69         | M             | Relapsed AML                     | 7+3, HiDAC                                                                                        | FLT3-ITD, NPM1-mut                                      |
| CFU-AML #2             | 60         | M             | AML arising from atypical CML-BC | Hydroxyurea, Ara-C                                                                                | FLT3-ITD                                                |
| CFU-AML #3             | 32         | F             | AML at diagnosis                 | N/A                                                                                               | FLT3-ITD                                                |
| CFU-AML #4             | 69         | F             | AML post MDS                     | Hydroxyurea                                                                                       | FLT3-ITD, NPM1-mut, DNMT3A-mut, IDH2-mut                |
| CFU-HD #1              | 58         | M             | Healthy donor                    | N/A                                                                                               | N/A                                                     |
| CFU-HD #2              | 30         | M             | Healthy donor                    | N/A                                                                                               | N/A                                                     |
| CFU-HD #3              | 29         | M             | Healthy donor                    | N/A                                                                                               | N/A                                                     |
| CFU-HD #4              | 28         | M             | Healthy donor                    | N/A                                                                                               | N/A                                                     |

**Supplementary Table S3 – Clinical data of primary samples used in PDX and CFU experiments. Related to Figure 6.**
